# Supplementary material
Source: PubMed Central journal article supplement (PMC6422100)
Supplement: supp_RA118.005970_140927_2_supp_265490_pl5270.pdf [file supp_RA118.005970_140927_2_supp_265490_pl5270.pdf]

**Supporting Information File: DEPDC5 muscle specific inducible knockout**

Skeletal Muscle Specific Knockout of DEPDC5 Increases mTORC1 Signaling,

Muscle Cell Hypertrophy, and Mitochondrial Respiratory Capacity

Ted G. Graber<sup>1,2</sup>, Christopher S. Fry<sup>2</sup>, Camille R. Brightwell<sup>3</sup>, Tatiana Moro<sup>2</sup>, Rosario Maroto<sup>2</sup>, Nisha Bhattari<sup>4</sup>, Craig Porter<sup>4</sup>, Maki Wakamiya<sup>5</sup>, Blake B. Rasmussen<sup>2\*</sup>

Running Title: DEPDC5 muscle specific inducible knockout

<sup>1</sup> Division of Rehabilitation Science, University of Texas Medical Branch, Galveston, TX 77555, USA;

<sup>2</sup> Department of Nutrition and Metabolism, University of Texas Medical Branch, Galveston, TX 77555, USA; <sup>3</sup> Program in Cell Biology, University of Texas Medical Branch, Galveston, TX 77555, USA;

<sup>4</sup> Department of Surgery: Burn Metabolism, University of Texas Medical Branch, Galveston, TX 77555, USA; <sup>5</sup> Transgenics Core Facility, University of Texas Medical Branch, Galveston, TX 77555, USA

\* To whom correspondence should be addressed: Blake B. Rasmussen, Department of Nutrition and Metabolism, University of Texas Medical Branch, 301 University Blvd., Galveston, TX 77555-1124, blasmus@utmb.edu

**Supporting Information File**

| <b>Table of Contents:</b>                                                              | <b>Page</b> |
|----------------------------------------------------------------------------------------|-------------|
| <b>Table S1 Muscle Fiber CSA and Fiber Typing.</b>                                     | <b>S2</b>   |
| <b>Table S2 Contractile and Muscle Properties.</b>                                     | <b>S3</b>   |
| <b>Figure S1 Genotyping the Depdc5 Knockout.</b>                                       | <b>S4</b>   |
| <b>Figure S2 Endurance Not Improved in Knockout Mice.</b>                              | <b>S5</b>   |
| <b>Figure S3 Overall Motor Function Not Improved in Knockout Mice.</b>                 | <b>S6</b>   |
| <b>Figure S4 Forelimb Grip Strength Not Improved in Knockout Mice.</b>                 | <b>S7</b>   |
| <b>Figure S5 Activity Rate Not Improved in Knockout Mice.</b>                          | <b>S8</b>   |
| <b>Figure S6 Mitochondrial Respiration in TA muscle.</b>                               | <b>S9</b>   |
| <b>Figure S7 Succinate Dehydrogenase Enzymatic Activity Correlates with Cell Size.</b> | <b>S10</b>  |

**Supporting Information File: DEPDC5 muscle specific inducible knockout**

|                                        | Sex:     | Male                 |                      |       |       | Female         |                |       |       |
|----------------------------------------|----------|----------------------|----------------------|-------|-------|----------------|----------------|-------|-------|
| Data Type                              | MHC Type | WT (n=5)             | KO (n=6)             | %dif  | P     | WT (n=5)       | KO (n=8)       | %dif  | P     |
| SOL CSA<br>$\mu\text{m}^2$             | MHC 1    | <i>1322.4 ± 43.5</i> | <i>1458.5 ± 52.6</i> | 13.2  | 0.034 | 1252.2 ± 48.2  | 1168.0 ± 59.1  | -6.7  | 0.341 |
|                                        | MHC 2a   | <i>1132.7 ± 42.9</i> | <i>1320.5 ± 71.8</i> | 19.2  | 0.036 | 1069.9 ± 80.9  | 998.2 ± 50.6   | 6.7   | 0.443 |
|                                        | MHC 2x   | <i>1304.8 ± 56.9</i> | <i>1588.2 ± 63.8</i> | 21.7  | 0.010 | 1196.9 ± 150.6 | 1055.1 ± 51.2  | -11.8 | 0.310 |
|                                        | MHC 2b   | 1418.3 ± 197.6       | 1391.6 ± 8.8         | -1.9  | 0.933 | N/A            | 2068.3a        | N/A   | N/A   |
|                                        | combined | 1227.6 ± 34.5        | <i>1424.0 ± 61.4</i> | 16.0  | 0.027 | 1161.1 ± 63.2  | 1089.1 ± 54.8  | -6.2  | 0.418 |
| SOL<br>Fiber Type<br>Distribution<br>% | MHC 1    | <i>37.0 ± 2.0</i>    | 34.0 ± 1.1           | -8.2  | 0.206 | 45.2 ± 2.4     | 45.4 ± 2.1     | 0.6   | 0.937 |
|                                        | MHC 2a   | 51.1 ± 1.6           | 54.2 ± 1.2           | 6.1   | 0.153 | 48.2 ± 2.4     | 45.6 ± 2.0     | -5.5  | 0.420 |
|                                        | MHC 2x   | 10.1 ± 0.76          | 9.9 ± 1.00           | -2.4  | 0.859 | 6.6 ± 1.3      | 8.1 ± 1.2      | 23.8  | 0.396 |
|                                        | MHC 2b   | 1.66 ± 0.72          | 1.85 ± 1.33          | 11.4  | 0.908 | 0.0            | 0.82 ± 0.77    | N/A   | 0.452 |
|                                        | Sex:     | Male                 |                      |       |       | Female         |                |       |       |
| Data Type                              | MHC Type | WT (n=8)             | KO (n=5)             | %dif  | P     | WT (n=5)       | KO (n=8)       | %dif  | P     |
| TA CSA<br>$\mu\text{m}^2$              | MHC 1    | 501.8 ± 88.5         | 424.7 a              | N/A   | N/A   | N/A            |                | N/A   | N/A   |
|                                        | MHC 2a   | <i>865.4 ± 64.1</i>  | <i>1012.3 ± 42.8</i> | 17.0  | 0.089 | 841.0 ± 89.1   | 757.6 ± 64.4   | -9.9  | 0.454 |
|                                        | MHC 2x   | 1557.6 ± 128.5       | 1546.4 ± 49.8        | -0.7  | 0.634 | 1435.1 ± 163.4 | 1152.5 ± 91.1  | -19.7 | 0.128 |
|                                        | MHC 2b   | 2614.4 ± 144.6       | 2689.7 ± 47.7        | 2.9   | 0.937 | 2451.8 ± 185.3 | 2082.6 ± 181.1 | -15.1 | 0.204 |
|                                        | combined | 1812.7 ± 125.9       | 2081.6 ± 127.5       | 14.8  | 0.164 | 1868.8 ± 133.5 | 1633.0 ± 143.2 | -12.6 | 0.287 |
| TA<br>Fiber Type<br>Distribution<br>%  | MHC 1    | 1.0 ± 0.34           | 0.2 ± 0.2            | -79.3 | 0.051 | 0.0            | 0.1 ± 0.06     | N/A   | 0.453 |
|                                        | MHC 2a   | 17.3 ± 4.9           | 5.9 ± 2.4            | -65.8 | 0.064 | 16.0 ± 6.0     | 10.4 ± 3.2     | -34.6 | 0.391 |
|                                        | MHC 2x   | 43.4 ± 3.4           | 43.8 ± 5.7           | 1.0   | 0.952 | 31.3 ± 2.8     | 31.8 ± 4.2     | 1.7   | 0.927 |
|                                        | MHC 2b   | 38.3 ± 6.4           | 50.1 ± 8.0           | 30.9  | 0.279 | 52.8 ± 2.8     | 57.7 ± 9.3     | 9.3   | 0.625 |

**Table SI1. Muscle Fiber CSA and Fiber Typing.** MHC = myosin heavy chain, SOL = soleus, TA = tibialis anterior, CSA = cross sectional area, WT = non-tamoxifen treated control mice, KO = tamoxifen treated experimental mice, %dif = percentage difference between WT and KO, P = P-value from 2-tailed Student's t-test, N/A = not applicable (due to division by zero, no data points in group, or other error). Data is expressed as mean of group ± the standard error. Numbers in italics indicates a trend (P<0.010) or significant difference (P<.050). <sup>a</sup> Only one mouse in the group expressed this MHC.

Supporting Information File: DEPDC5 muscle specific inducible knockout

|          |                    | Sex:               | Male         |              |       |       | Female       |              |       |       |
|----------|--------------------|--------------------|--------------|--------------|-------|-------|--------------|--------------|-------|-------|
| Muscle   | Data Type          | Unit               | WT (n=7)     | KO (n=11)    | %dif  | P     | WT (n=9)     | KO (n=13)    | %dif  | P     |
| EDL      | P <sub>t</sub>     | mN                 | 78.6 ± 6.2   | 69.9 ± 4.5   | -11.1 | 0.211 | 63.3 ± 4.5   | 61.8 ± 4.4   | -2.4  | 0.825 |
|          | P <sub>0</sub>     | mN                 | 384.7 ± 19.2 | 378.1 ± 23.4 | -1.7  | 0.211 | 309.7 ± 17.0 | 297.3 ± 10.1 | -4.0  | 0.511 |
|          | P <sub>0</sub> Hz. | Hz                 | 150.0 ± 9.3  | 152.7 ± 2.7  | 1.8   | 0.720 | 143.0 ± 4.4  | 156.9 ± 3.6  | 9.7   | 0.028 |
|          | Sp. F.             | mN/mm <sup>2</sup> | 41.7 ± 2.5   | 42.1 ± 2.5   | 1.0   | 0.902 | 41.1 ± 2.3   | 42.6 ± 2.0   | 3.6   | 0.628 |
|          | PCSA               | mm <sup>2</sup>    | 9.60 ± 0.31  | 9.29 ± 0.46  | -3.2  | 0.629 | 7.55 ± 0.19  | 7.04 ± 0.16  | -6.8  | 0.055 |
|          | L <sub>0</sub>     | mm                 | 12.1 ± 0.3   | 12.3 ± 0.3   | 1.7   | 0.615 | 11.7 ± 0.2   | 12.2 ± 0.2   | 4.3   | 0.169 |
|          |                    | Sex:               | Male         |              |       |       | Female       |              |       |       |
| Muscle   | Data Type          | Unit               | WT (n=10)    | KO (n=14)    | %dif  | P     | WT (n=11)    | KO (n=14)    | %dif  | P     |
| SOL      | P <sub>t</sub>     | mN                 | 49.4 ± 4.2   | 42.7 ± 3.4   | -13.6 | 0.221 | 40.8 ± 4.2   | 39.1 ± 1.6   | -4.2  | 0.695 |
|          | P <sub>0</sub>     | mN                 | 294.8 ± 16.4 | 277.3 ± 13.1 | -5.9  | 0.409 | 234.1 ± 19.0 | 232.4 ± 9.7  | -0.7  | 0.931 |
|          | P <sub>0</sub> Hz. | Hz                 | 112.0 ± 3.3  | 111.4 ± 4.9  | -0.5  | 0.930 | 120.9 ± 6.2  | 117.9 ± 5.3  | -2.5  | 0.710 |
|          | Sp. F.             | mN/mm <sup>2</sup> | 27.2 ± 1.3   | 26.6 ± 1.4   | -2.2  | 0.764 | 27.3 ± 2.8   | 26.1 ± 1.3   | -4.4  | 0.697 |
|          | PCSA               | mm <sup>2</sup>    | 10.95 ± 0.66 | 10.53 ± 0.34 | -3.8  | 0.541 | 8.98 ± 0.51  | 9.05 ± 0.31  | 0.8   | 0.987 |
|          | L <sub>0</sub>     | mm                 | 11.8 ± 0.4   | 12.5 ± 0.2   | 5.9   | 0.059 | 10.8 ± 0.4   | 10.9 ± 0.2   | 0.9   | 0.948 |
|          |                    | Sex:               | Male         |              |       |       | Female       |              |       |       |
| Muscle   | Data Type          | Unit               | WT (n=10)    | KO (n=15)    | %dif  | P     | WT (n=11)    | KO (n=14)    | %dif  | P     |
| GAST     | Mass               | mg                 | 155.7 ± 3.34 | 169.57 ± 5.3 | 8.9   | 0.061 | 118.5 ± 11.7 | 117.6 ± 9.4  | -0.8  | 0.951 |
| PLANT    | Mass               | mg                 | 20.7 ± 1.0   | 22.4 ± 0.9   | 8.2   | 0.234 | 16.3 ± 0.8   | 16.1 ± 0.5   | -1.2  | 0.788 |
| TA       | Mass               | mg                 | 53.00 ± 1.8  | 50.0 ± 1.6   | -5.7  | 0.234 | 42.5 ± 1.2   | 39.2 ± 0.9   | -7.8  | 0.040 |
| SOL      | Mass               | mg                 | 13.5 ± 1.1   | 14.1 ± 0.5   | 4.4   | 0.615 | 10.3 ± 0.7   | 10.4 ± 0.4   | 1.0   | 0.871 |
| EDL      | Mass               | mg                 | 12.1 ± 0.28  | 12.9 ± 0.4   | 6.6   | 0.108 | 9.9 ± 0.5    | 9.1 ± 0.2    | -8.1  | 0.123 |
| Bodymass | %change            | %                  | 1.50 ± 1.49  | 3.74 ± 1.02  | 149.3 | 0.211 | 6.3 ± 1.7    | 2.7 ± 1.4    | -57.1 | 0.102 |

**Table SI2: Contractile and Muscle Properties.** EDL = extensor digitorum longus; SOL = soleus; WT = wild type; KO = knockout; P<sub>t</sub> = peak twitch force; P<sub>0</sub> = peak isometric tetanic force; P<sub>0</sub> Hz = frequency of stimulation in Hertz at P<sub>0</sub>; SP. F. = specific force; PCSA = physiological cross-sectional area, determined by formula; L<sub>0</sub> = muscle length at P; %dif = percent difference between WT and KO; P = P-value from independent t-test; data presented as mean of group ± standard error; italics = P<0.100.

## Supporting Information File: DEPDC5 muscle specific inducible knockout

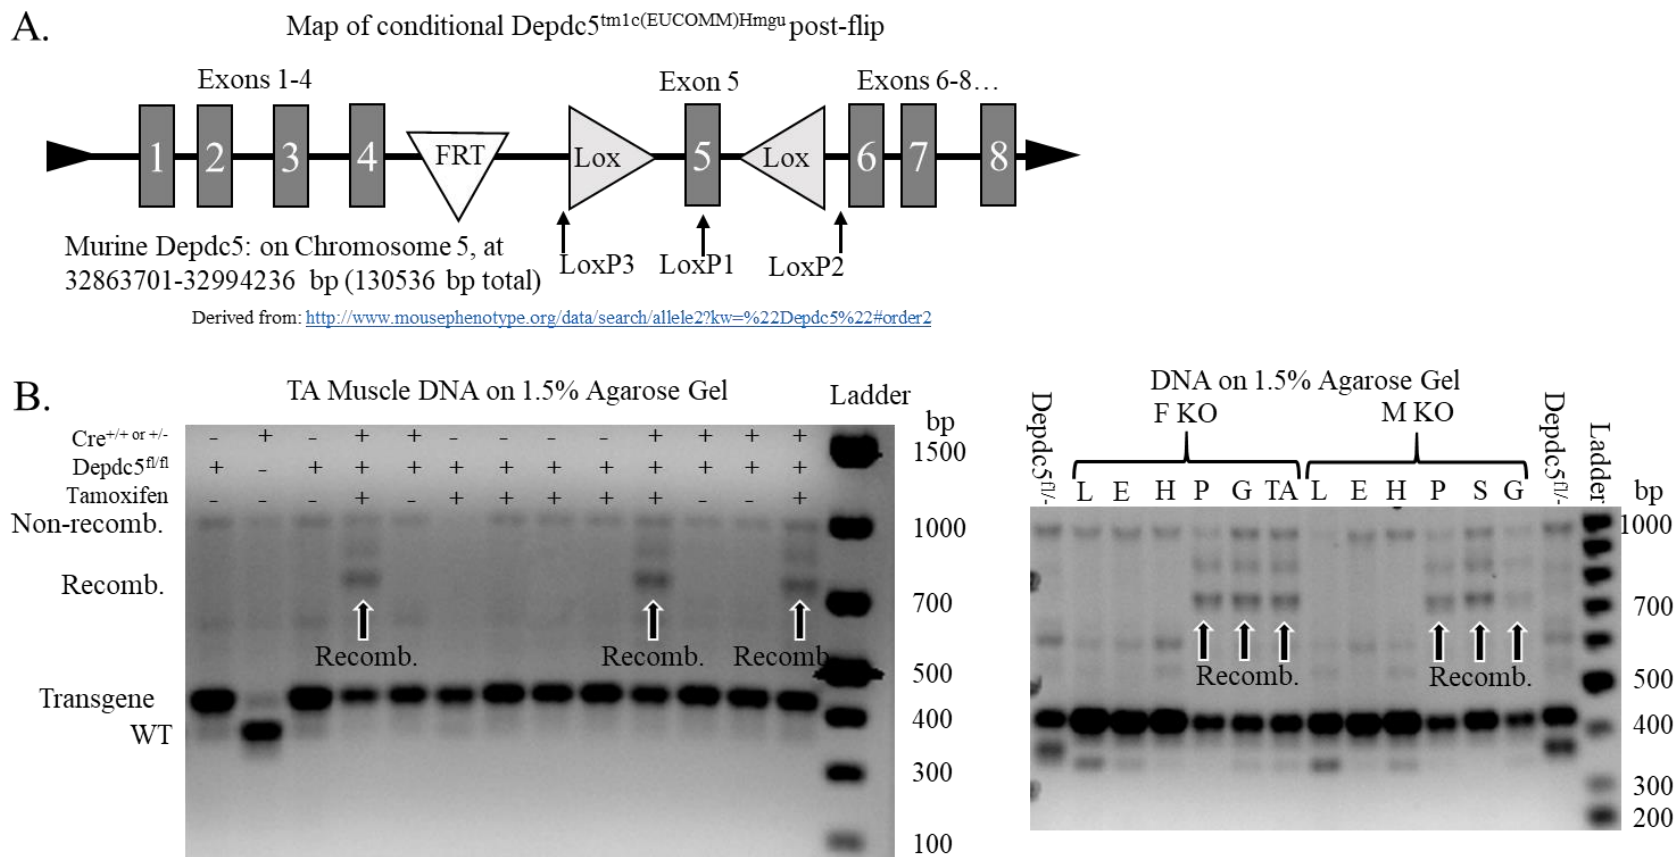

**Figure S11: A. Map of lox sites on the  $Depc5$  gene and primer locations.** The lox sites are on either side of exon 5. Exon 5 is expressed in all isoforms, thus transgenic ablation of exon 5 using cre-recombinase represses  $Depdc5$  gene expression. LoxP1, LoxP2 and LoxP3 on the figure show the location of primers. **B. Amplicons produced from PCR with LoxP1, P2 and P3.** The PCR product of LoxP1 and LoxP2 has amplicons at 431 bp if the lox site is present and at 368 bp if the allele is wild type. The PCR product of LoxP3 and LoxP2 has amplicons at 1349 bp for the floxed allele, 1069 bp if the allele is wild type, and at 749 bp in a recombinant allele (exon 5 not expressed). The amplicon at 1349 is not replicated when all 3 primers are used in one PCR Reaction. See Figure 1 for amplicons formed with only LoxP2 and LoxP3. Bp = base pairs; - or + signs = presence of allele in Cre<sup>+/+</sup> or +/- (homo- or heterozygous  $Tg^{(ACTA1-cre/Esr1^*)2Kesr}$  and  $Depdc5^{fl/fl}$  (homozygous  $Depdc5^{tm1c(EUCOMM)Hmgu}$ ) rows and whether or not tamoxifen was given;  $Depdc5^{fl/-}$  (heterozygous for  $Depdc5^{tm1c(EUCOMM)Hmgu}$ ), recomb. = recombination product, F = female, M = male, L = liver, E = skin (from ear punch), H = heart, P = plantaris, G = gastrocnemius, TA = tibialis anterior, S = soleus.

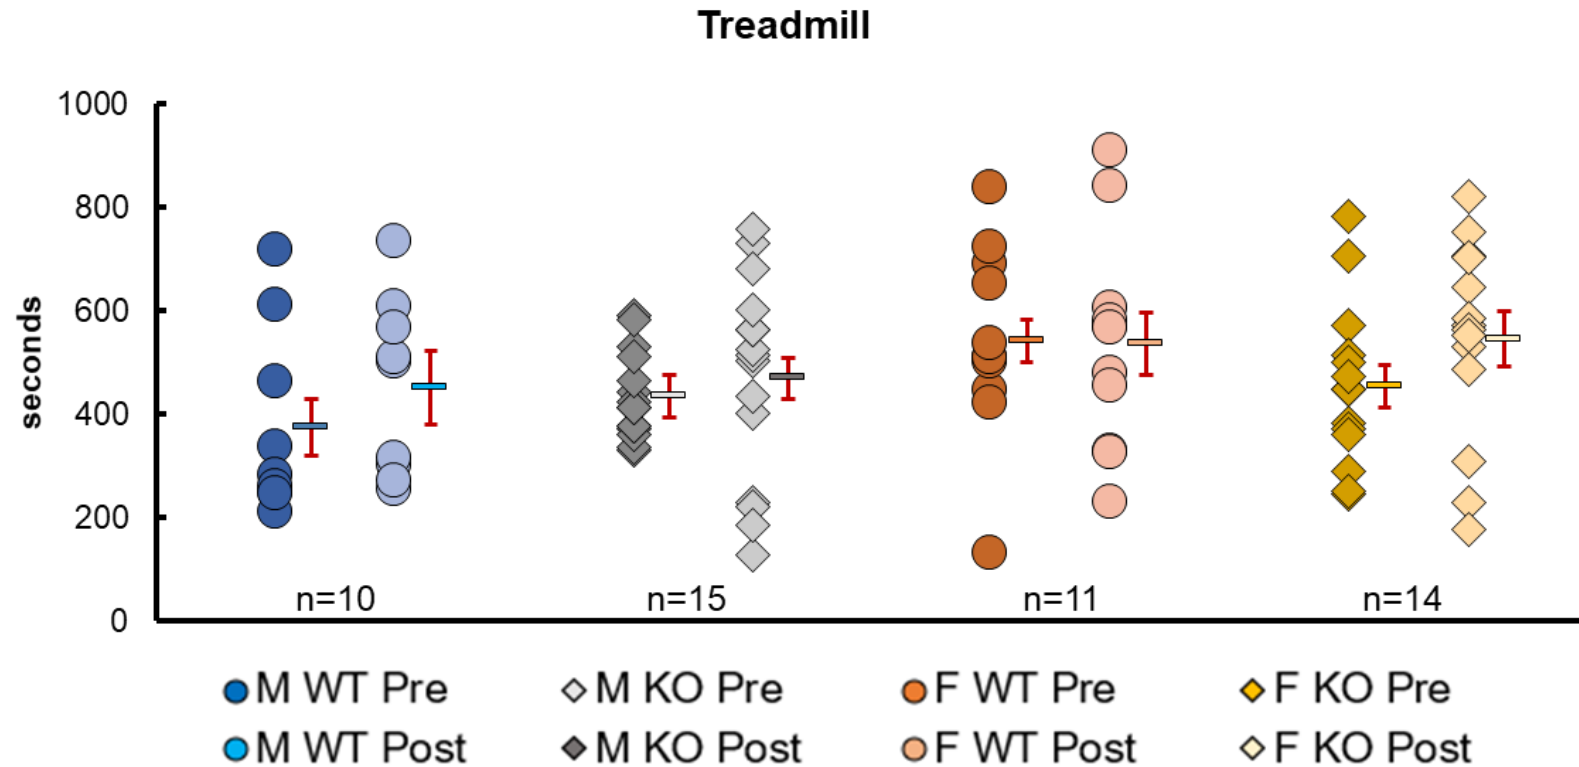

**Figure S12. Endurance Not Improved in Knockout Mice.** Function did not change significantly within any group from pre- to post- testing. WT = wild type mice, KO = transgenic knock-out mice, each symbol (circle for WT and diamond for KO) represents an individual mouse. To the right of each group the rectangle= the mean  $\pm$  standard error. M = male, F = female. Pre = before tamoxifen induced recombination, Post = 6 weeks after tamoxifen. A 2x2x2 ANCOVA (2 treatment groups, WT and KO; 2 sexes; 2 timepoints, before and 6-weeks after tamoxifen treatment in the EXP group, and 6 weeks after the pre-testing for the WT group) adjusted for body mass was used to determine differences with the least significant difference posthoc test (paired t-test) set at significance of  $P < 0.05$ .

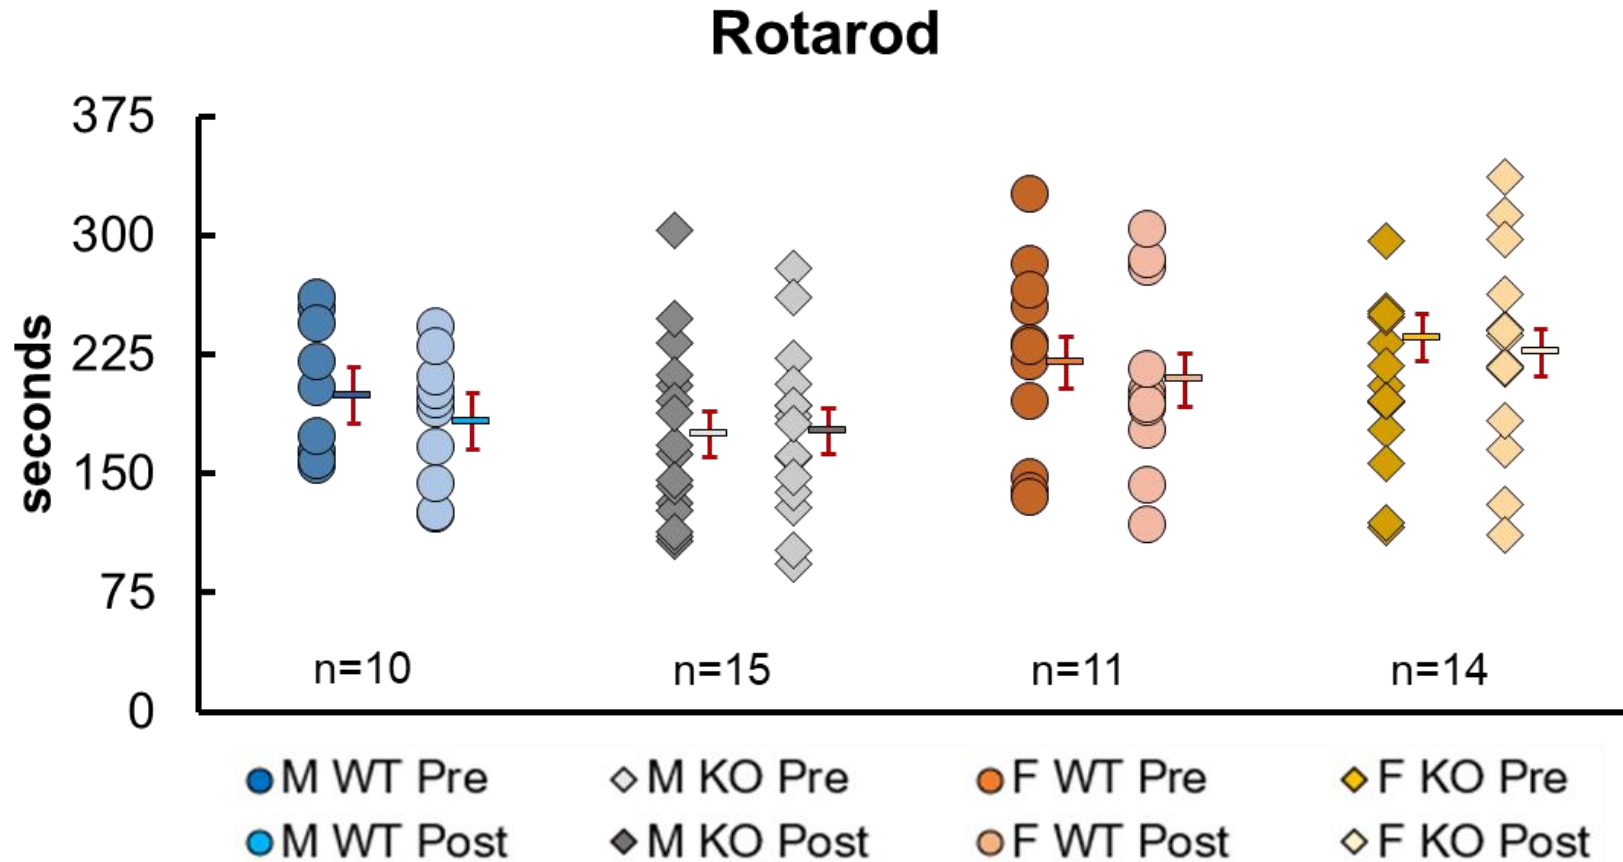

**Figure SI3. Overall Motor Function Not Improved in Knockout Mice.** Function did not change significantly within any group from pre- to post-testing. WT = wild type mice, KO = transgenic knock-out mice, each symbol represents an individual mouse. To the right of each group the rectangle = the mean  $\pm$  standard error. M = male, F = female. Pre = before tamoxifen-induced recombination, Post = 6 weeks after tamoxifen-induced recombination. A 2x2x2 ANCOVA (2 treatment groups, WT and KO; 2 sexes; 2 timepoints, before and 6-weeks after tamoxifen treatment in the EXP group, and 6 weeks after the pre-testing for the WT group) adjusted for body mass was used to determine differences with the least significant difference posthoc test (paired t-test) set at significance of  $P < 0.05$ .

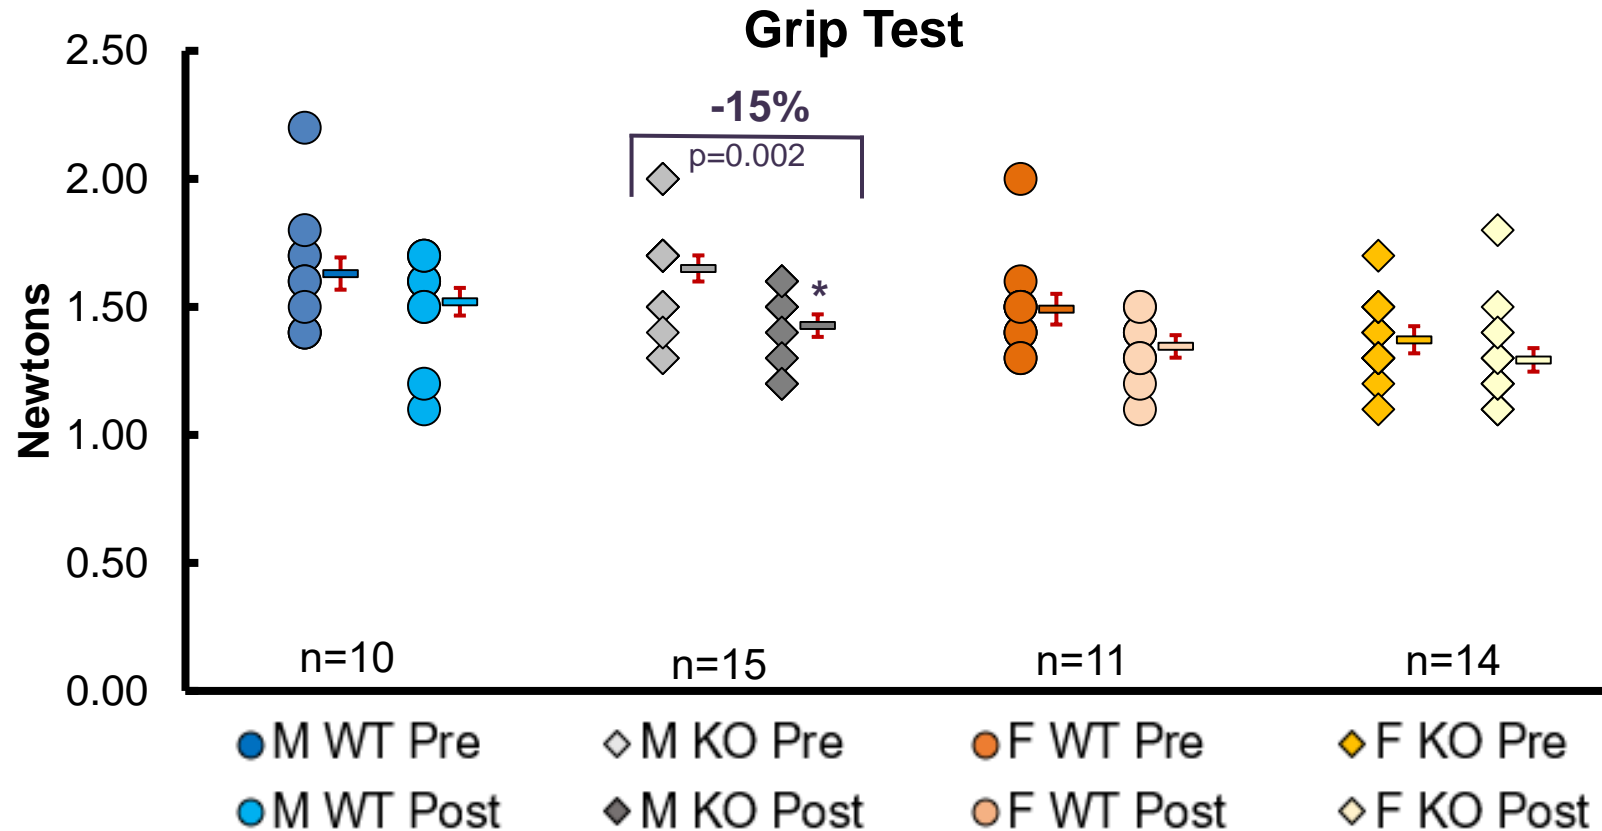

**Figure SI4. Forelimb Grip Strength Not Improved in Knockout Mice.** Other than the male KO who lost function, grip strength did not change significantly within any group from pre- to post- testing. WT = wild type mice, KO = transgenic knock-out mice, each symbol represents an individual mouse. To the right of each group the rectangle = the mean  $\pm$  standard error. M = male, F = female. Pre = before recombination, Post = 6 weeks after recombination. A 2x2x2 ANCOVA (2 treatment groups, WT and KO; 2 sexes; 2 timepoints, before and 6-weeks after tamoxifen treatment in the EXP group, and 6 weeks after the pre-testing for the WT group) adjusted for body mass was used to determine differences with the least significant difference posthoc test (paired t-test) set at significance of  $P < 0.05$ .

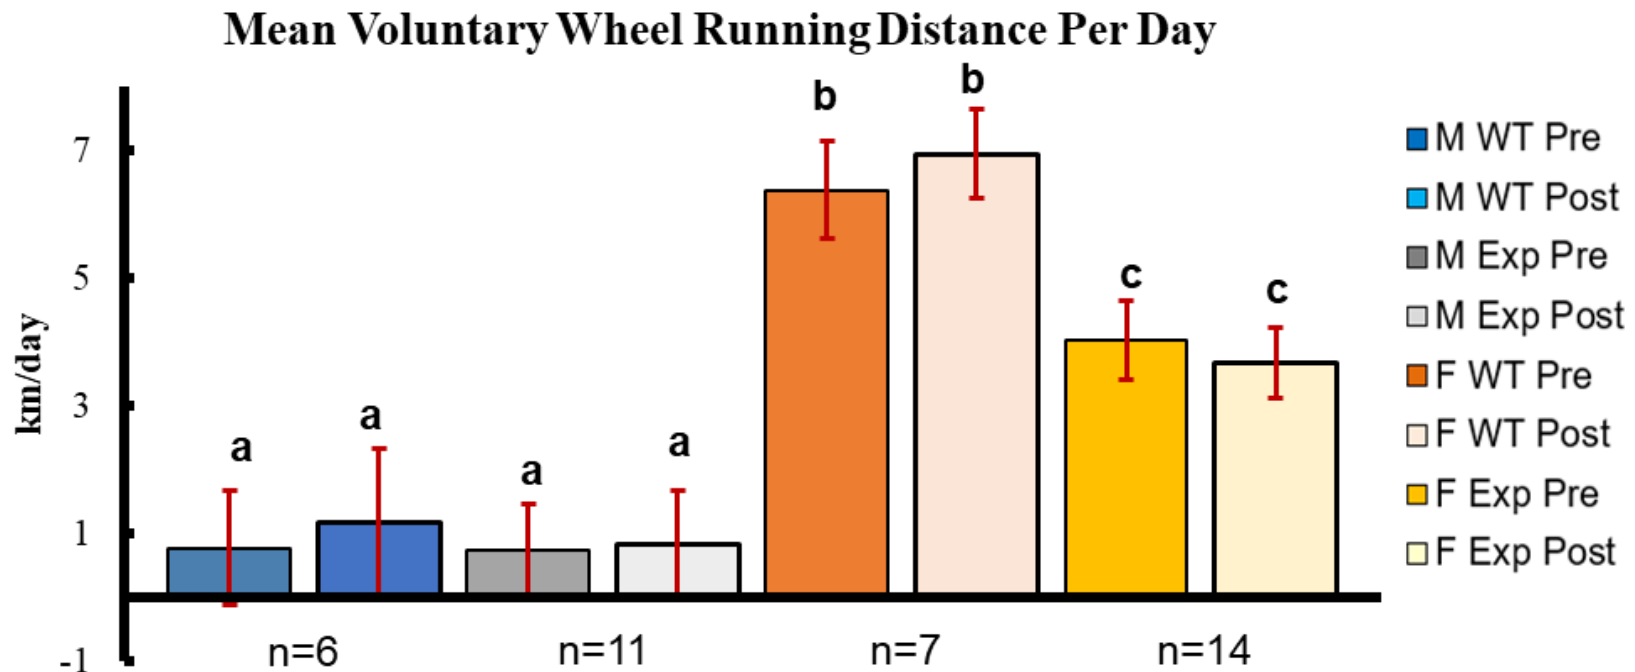

**Figure S15. Activity Rate Not Improved in Knockout Mice.** Function did not change significantly within any group from pre- to post-testing. WT = wild type mice, KO = transgenic knock-out mice. The error bar is  $\pm$  standard error. M = male, F = female. Pre = before tamoxifen-induced recombination, Post = 6 weeks after tamoxifen-induced recombination. A 2x2x2 ANCOVA (2 treatment groups, WT and KO; 2 sexes; 2 timepoints, before and 6-weeks after tamoxifen treatment in the EXP group, and 6 weeks after the pre-testing for the WT group) adjusted for body mass was used to determine differences with the least significant difference posthoc test (paired t-test) set at significance of  $P < 0.05$ . Different letter indicates significant difference.



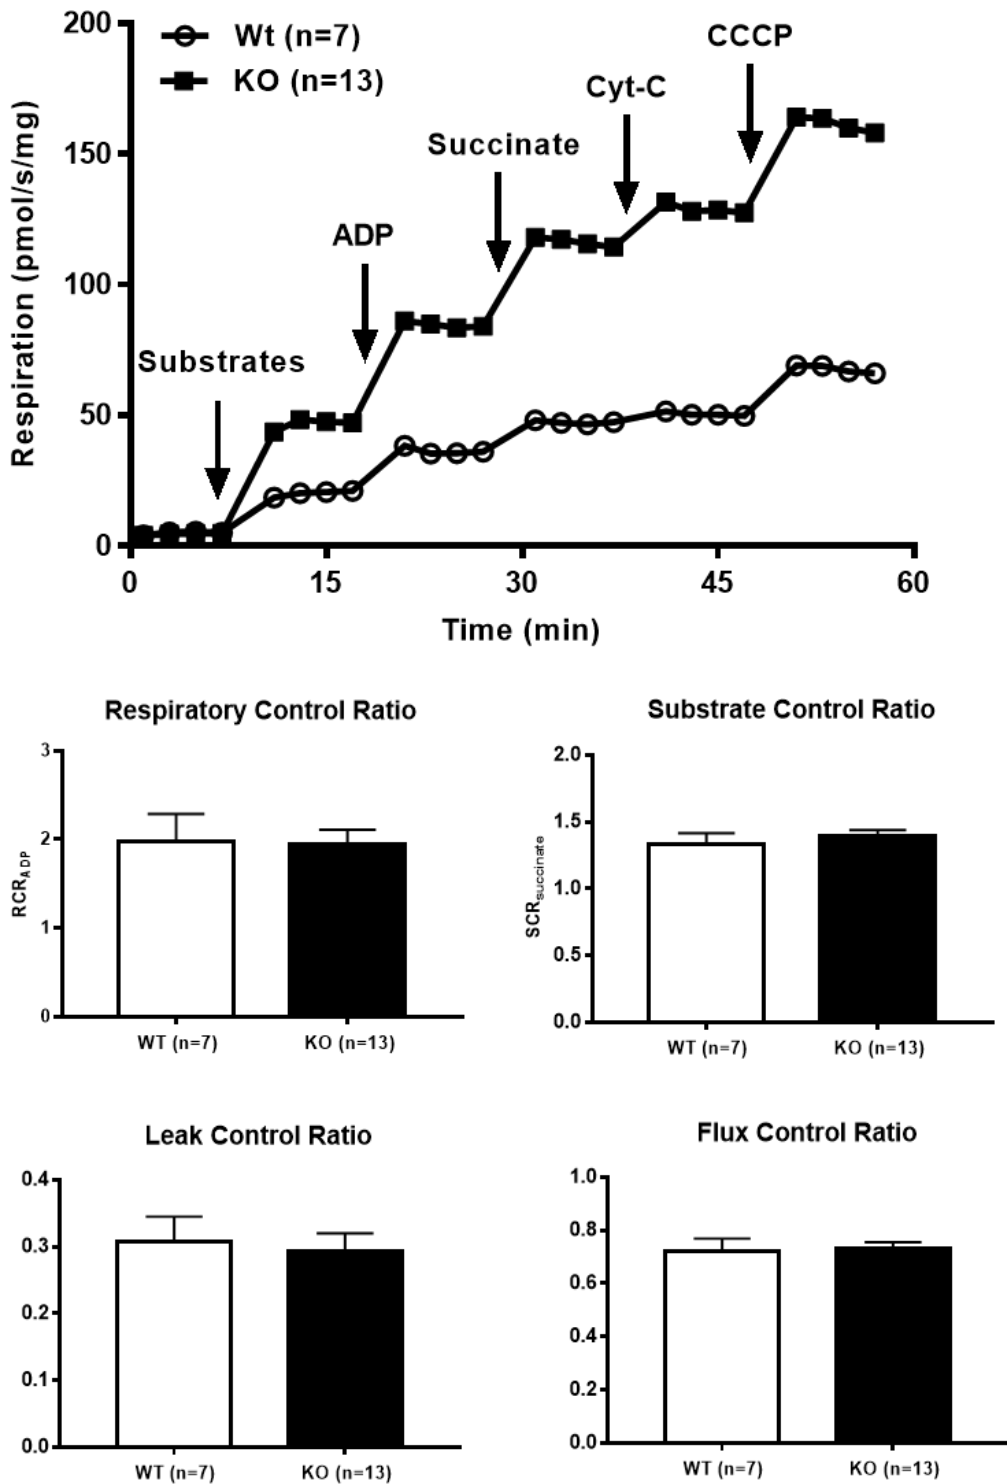

**Figure SI6 Mitochondrial Respiration in TA muscle. A. Respiration.** Respiration in stages I-IV is higher in KO per unit of muscle. **B. Ratios.** The ratios demonstrate no difference in mitochondrial efficiency. KO = knockout mice; WT = wild type control

Supporting Information File: DEPDC5 muscle specific inducible knockout

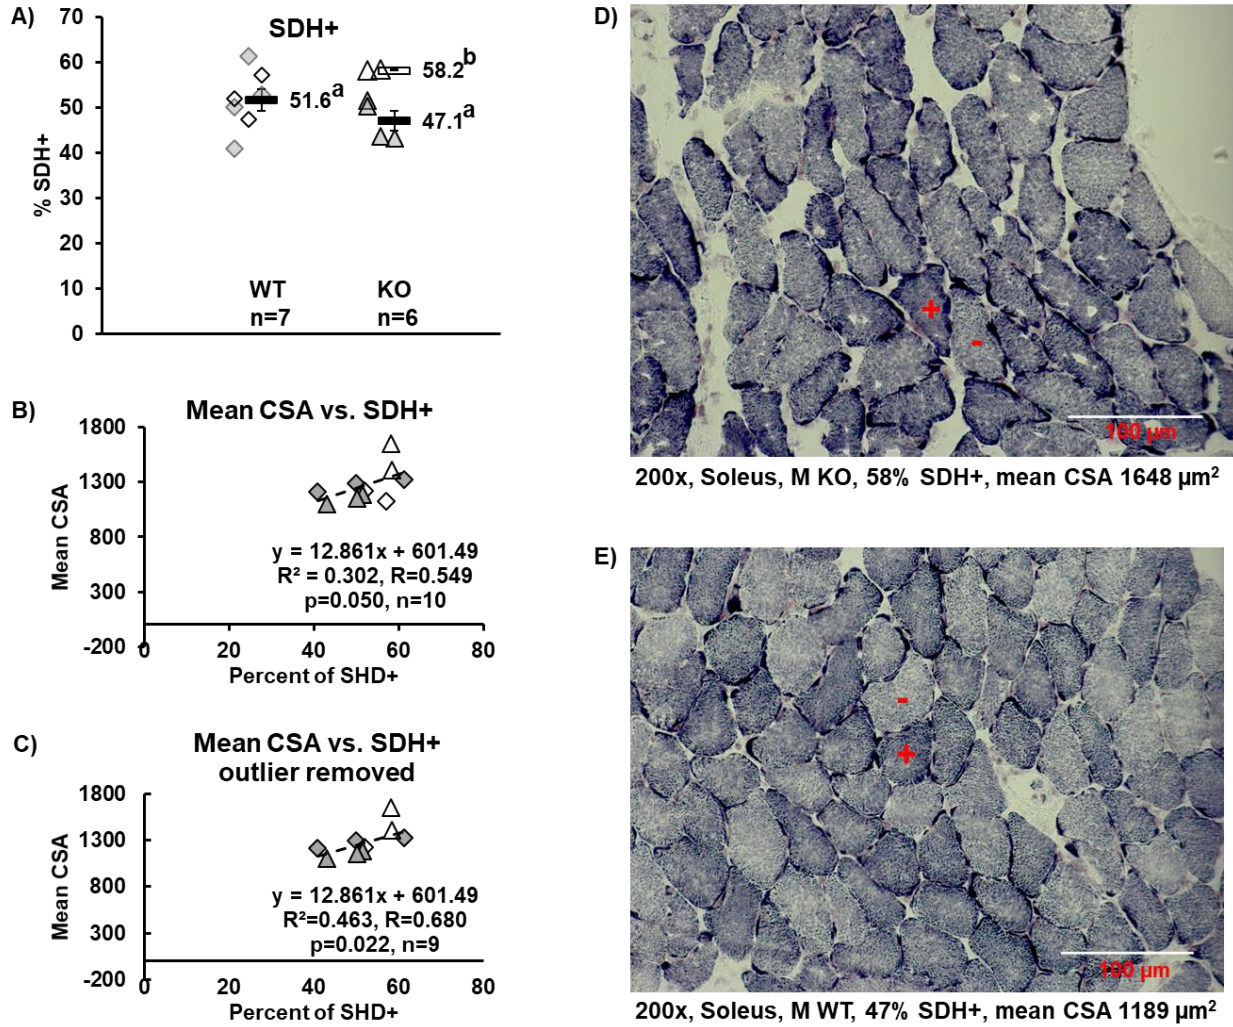

**Figure SI7 SOL SDH Enzymatic Activity.** Cells were counted as either positive (dark stain) or negative (light stain). Degree of staining indicates higher SDH activity. **A)** M KO cells had significantly more ( $P < 0.05$ ) positive cells than the combined WT (M + F) or the F KO. Different letter indicates significance. **B)** There is a moderate positive correlation of cell size with SDH positive percentage. **C)** When the one outlier ( $> 2$  sd above mean for SDH+) is removed, the association becomes moderately strong. **D)** and **E)** are representative images. Each symbol represents the aggregate percentage of positive cells in one mouse. SD = standard deviation. SDH = succinate dehydrogenase, + = highly active cells, - = less active cells, SOL = soleus, Mean CSA is in microns squared, M = male, F = female, WT = wild type, KO = knockout, equations are simple linear regressions.
